# Supplementary material
Source: PubMed Central journal article supplement (PMC3673551)
Supplement: NIHMS454341-supplement-01.pdf [file NIHMS454341-supplement-01.pdf]

# **Supplemental Information for Suppression of Androgen Receptor, A Key Factor in Male Sexual Phenotype, Enhances the Self-renewal of Mesenchymal Stem Cells Through Elevated Expression of EGFR**

## **Supplemental Figure legends**

**Supplemental Figure 1. BM-MSCs AR functional validation.** MMTV Luciferase containing strong androgen response element was transfected to WT and ARKO BM-MSCs. WT BM-MSCs luciferase activity was normalized to ARKO BM-MSCs basal level. \*\*,  $p < 0.001$  when compared to control.

**Supplemental Figure 2 Osteogenic differentiation in WT and ARKO BM-MSCs.** Expressions of Dmp1 were determined using qRT-PCR in undifferentiated WT and ARKO BM-MSCs, and differentiated WT and ARKO BM-MSCs at day 21.

**Supplemental Figure 3 WT and ARKO BM-MSCs retain multipotency.** CFU-alkaline phosphatase (CFU-ALP), CFU-osteoblast (CFU-O), and CFU-adipocyte, which represented osteoprogenitor, osteogenesis, and adipogenesis respectively, were used to measure their multi-lineage

differentiation capacities.

**Supplemental Figure 4 AR and pEGFR localizations upon androgen treatment.** AR, pEGFR, and merged images were shown in MSCs treated either with vehicle (EtOH) or androgen (DHT) for 10 minutes, 30 minutes, and 24 hours.

**Supplemental Figure 5 AR negatively regulates EGFR promoter activity. (A)**

Illustration of the EGFR promoter region which contains 2 putative androgen receptor response elements (ARE). (B) pGL3-luciferase plasmids hooked with EGFR promoter regions from -2396 to +3 and from -831 to +3, and MMTV-luciferase were transfected into HEK-293T cells with or without AR to test the AR effect in regulating EGFR promoter transcriptional activity.

**Supplemental Figure 6 Targeting AR effects on BM-MSCs self-renewal. (A)**

WT and (B) ARKO BM-MSCs were cultured with or without hydroxyflutamide (HF) plus exogenous ligand, DHT, to test HF effect on BM-MSCs self-renewal. ASC-J9 was used to treat (C) WT and (D) ARKO BM-MSCs in the presence of DHT to determine its effect on BM-MSC self-renewal. (E) WT and (F) ARKO BM-MSCs was infected with lentivirus which contain either scramble control or siRNA-AR and then performed CFU-f assays to test siRNA-AR effects on BM-MSCs self-renewal. \*,  $p < 0.05$ ; \*\*\*,  $p < 0.0001$ , when compared with control.

Supplemental Figure 1

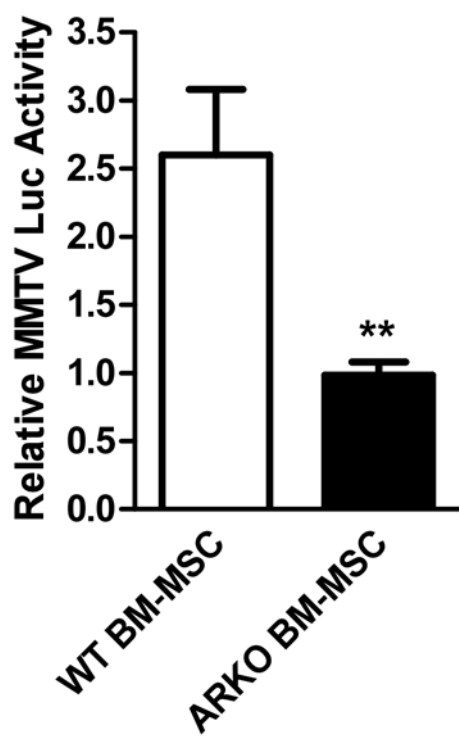

Supplemental Figure 2

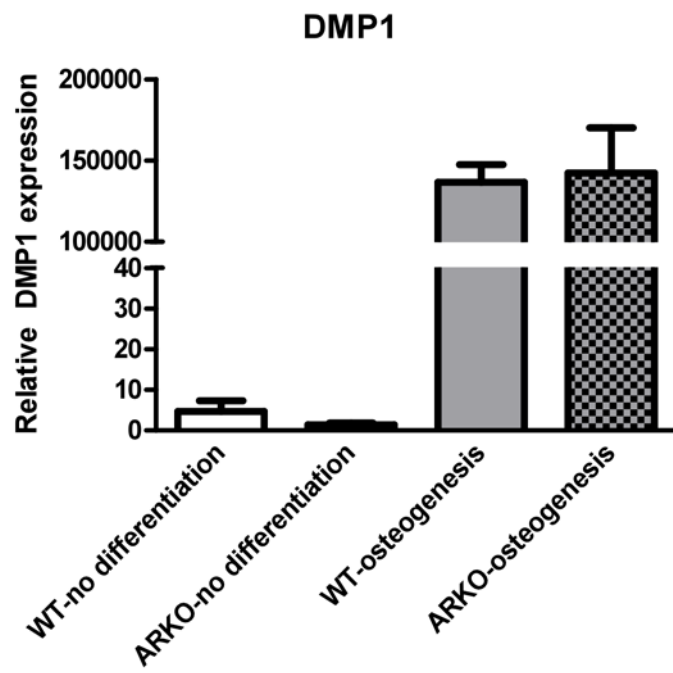



Supplemental Figure 3

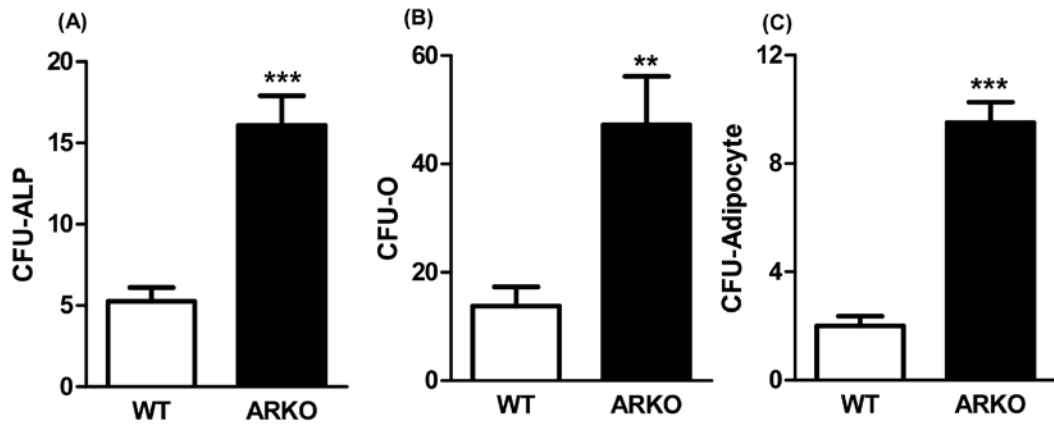

Supplemental Figure 4

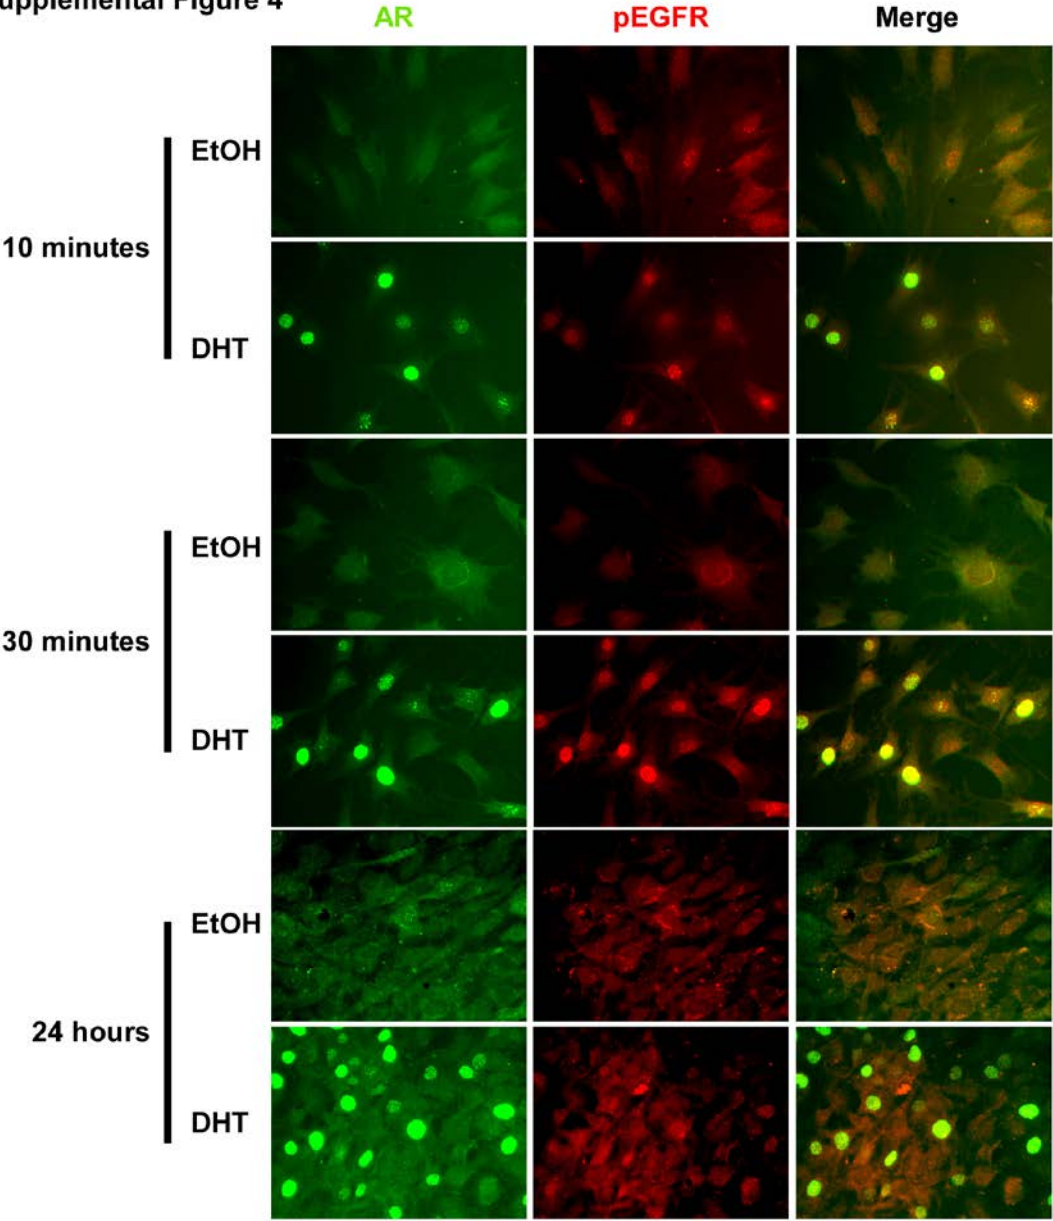

Supplemental Figure 5

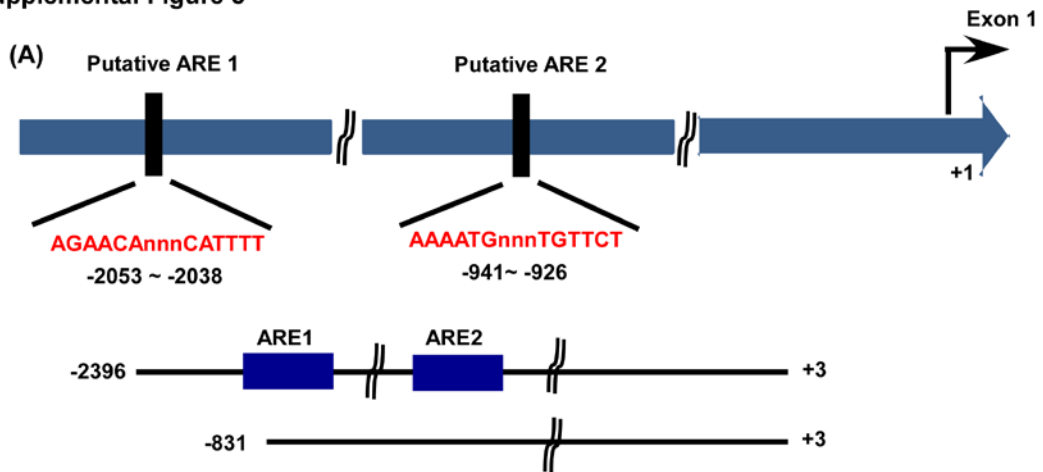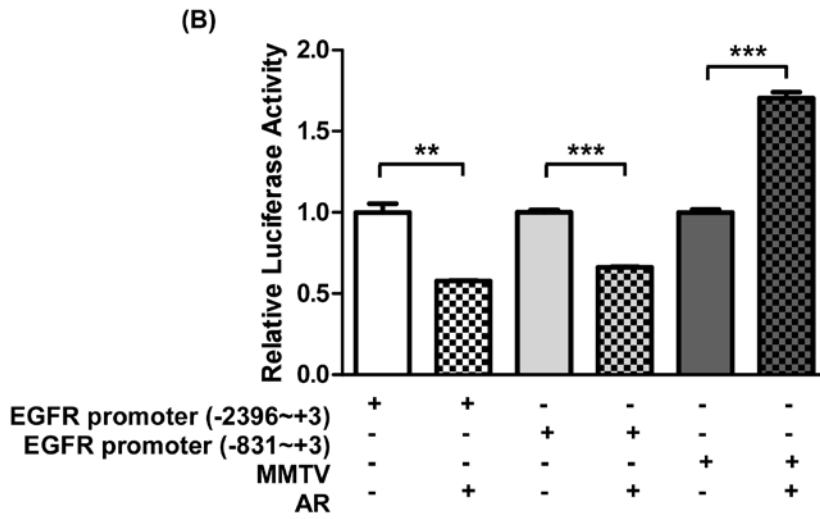



Supplemental Figure 6

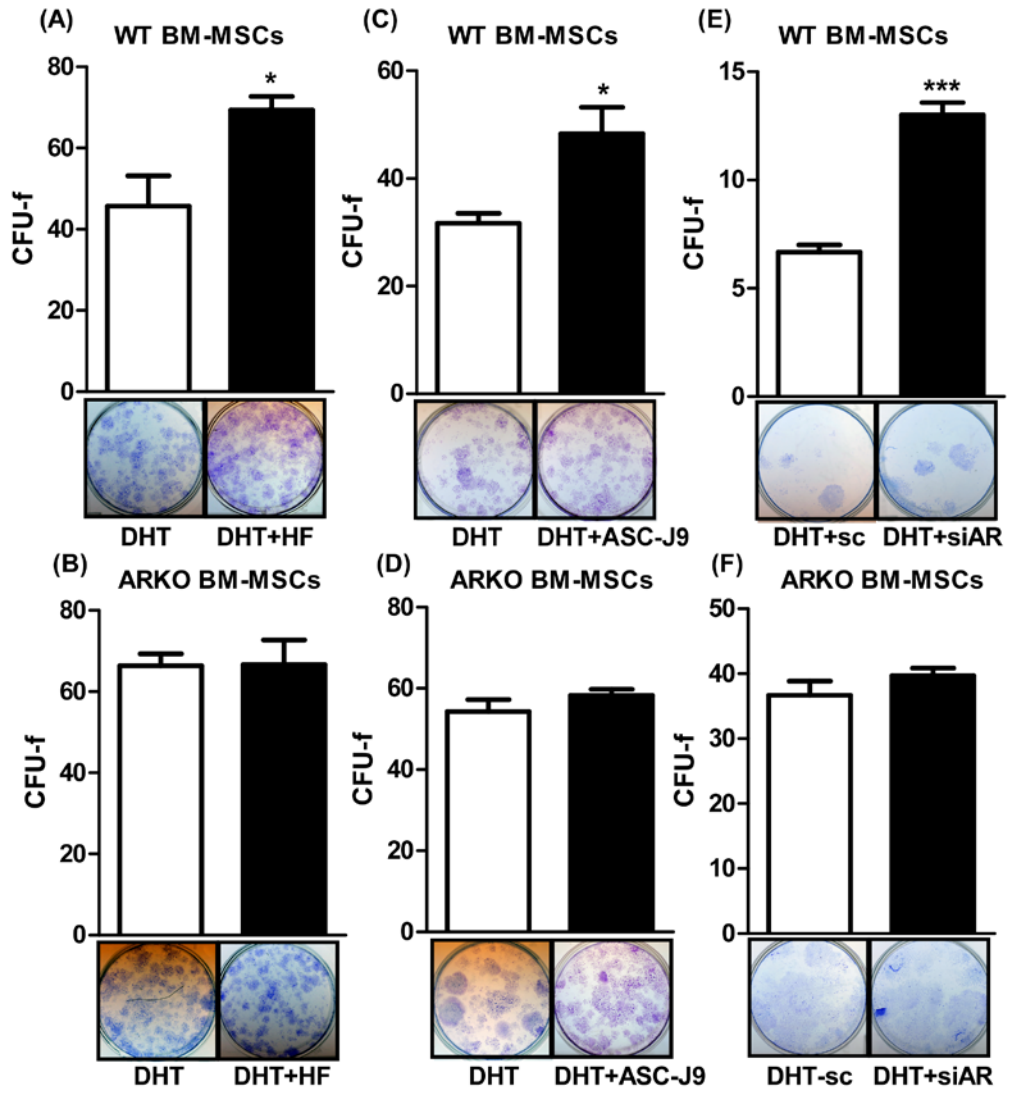

**Supplemental Table 1 Surface markers expressions in BM-MSCs and ADSCs**

|              | <b>BM-MSCs</b> | <b>ADSCs</b> |
|--------------|----------------|--------------|
| <b>CD44</b>  | 99.0%          | 99.3%        |
| <b>CD29</b>  | 98.5%          | 98.0%        |
| <b>CD117</b> | 29.4%          | 27.2%        |
| <b>CD106</b> | 32.5%          | 33.4%        |
| <b>CD45</b>  | 1.28%          | 0.85%        |
| <b>CD34</b>  | 0.59%          | 1.37%        |
